# Supplementary material for: Characterization of influenza A viruses with polymorphism in PB2 residues 701 and 702
Source: PubMed Central journal article supplement (PMC5595998; doi:10.1038/s41598-017-11625-y), 2017-09-12
Supplement: 41598_2017_11625_MOESM1_ESM.pdf [file 41598_2017_11625_MOESM1_ESM.pdf]

## **Supplementary information**

### **Characterization of influenza A viruses with polymorphism in PB2 residues 701 and 702**

Alex W.H. Chin<sup>1,+</sup>, Nathaniel K.C. Leong<sup>1,+</sup>, John M. Nicholls<sup>2</sup>, Leo L.M. Poon<sup>1,\*</sup>

<sup>1</sup>Centre of Influenza Research & School of Public Health, LKS Faculty of Medicine, The University of Hong Kong

<sup>2</sup>Department of Pathology, LKS Faculty of Medicine, The University of Hong Kong

<sup>+</sup>these authors contribute equally to this work

<sup>\*</sup>corresponding author (llmpoon@hku.hk)

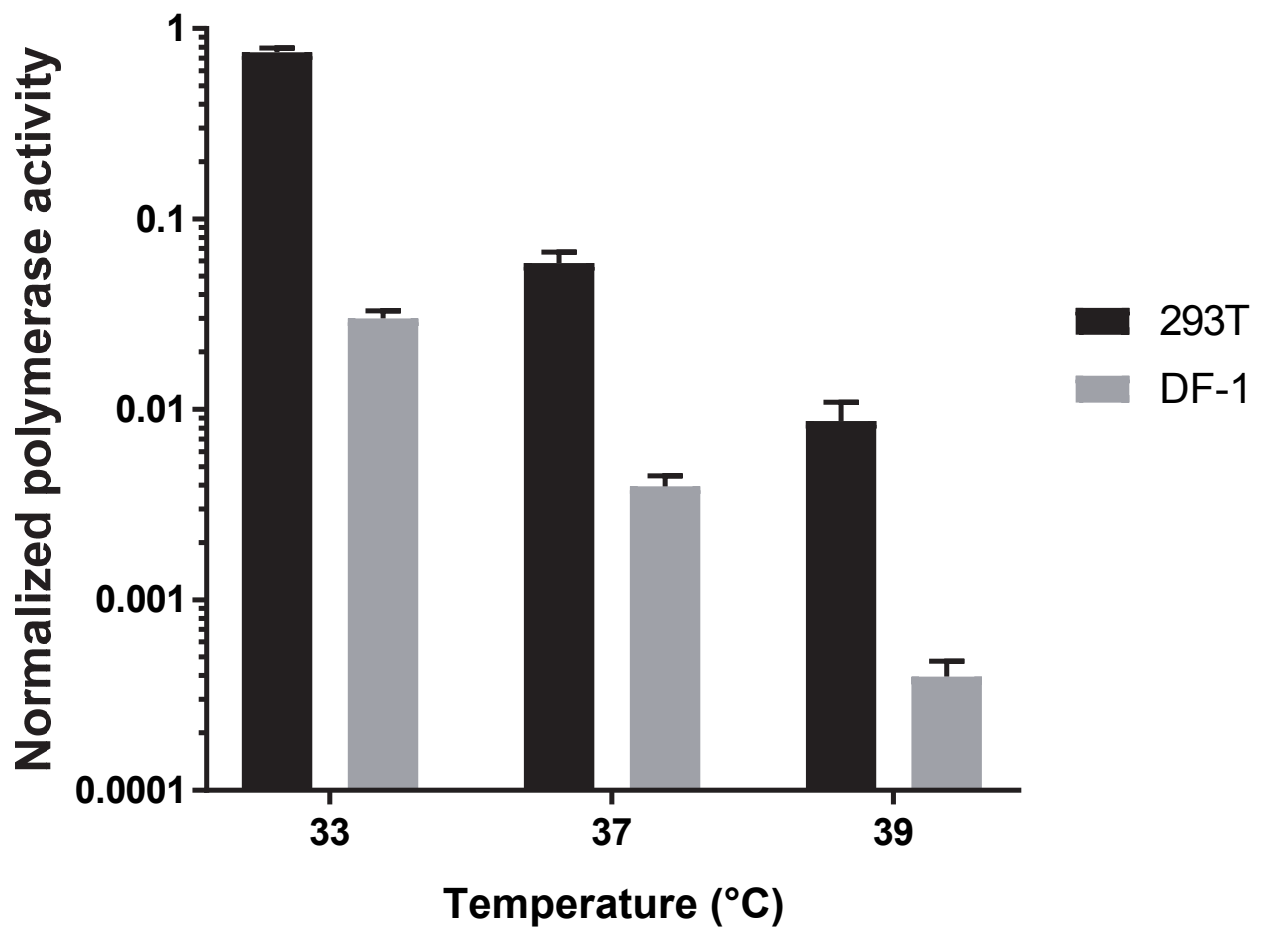

Supplementary Fig. S1 Normalized polymerase activity of wild-type vRNP in 293T and DF-1 cells at different temperatures. Data was presented as mean  $\pm$  1 s.d. (n = 3).

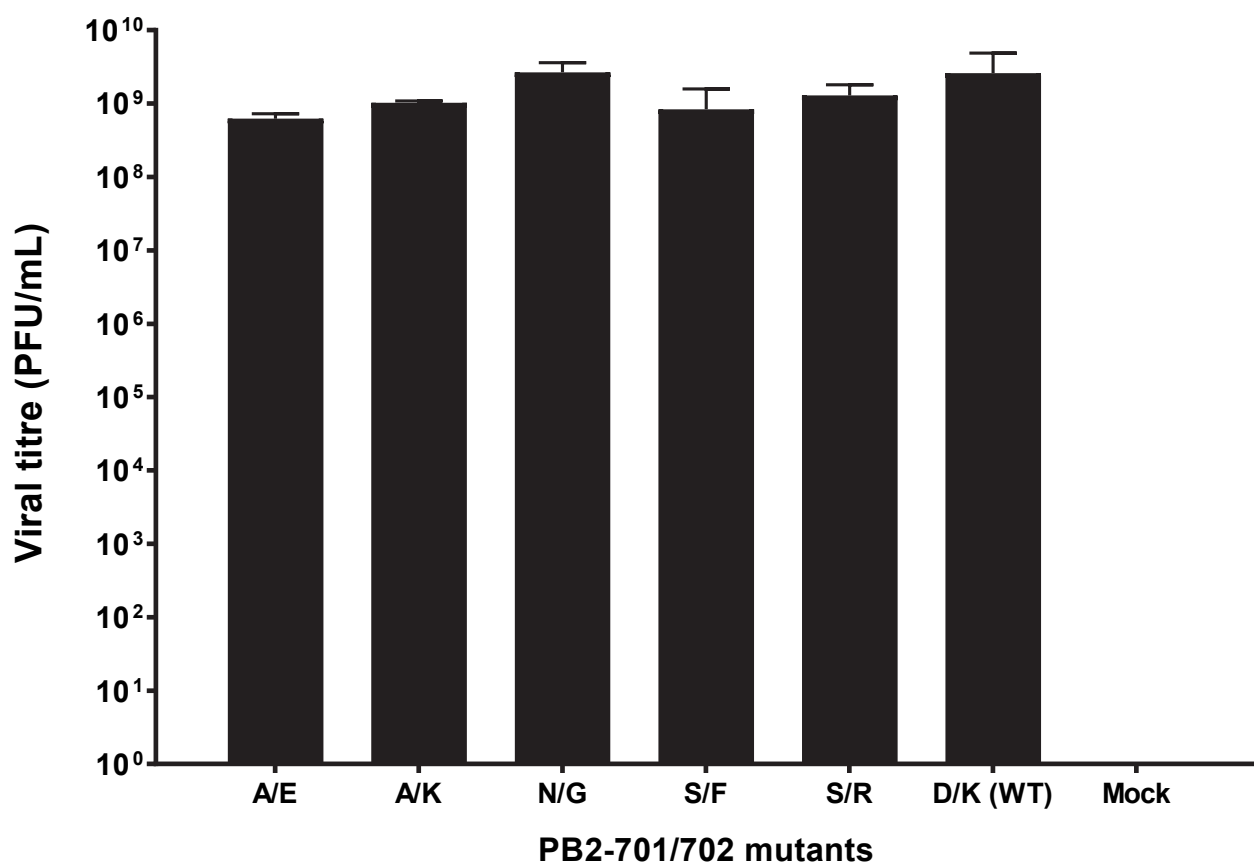

Supplementary Fig. S2 Viral titres of wild-type and PB2-701 and 702 mutants infected embryonic chicken eggs at 48 h.p.i. Data was presented as mean  $\pm$  1 s.d. (n = 3).

Supplementary Table S1 Overall surface charge of PB2-700 to 703 region and the polymerase activity of PB2-701/702 mutants in 293T and DF-1 cells

| PB2-701/702 mutants | Overall surface charge of PB2-700 to 703 region (kT/e) | 293T, 37°C                     |                                           | DF1, 37°C                      |                                           |
|---------------------|--------------------------------------------------------|--------------------------------|-------------------------------------------|--------------------------------|-------------------------------------------|
|                     |                                                        | Normalized polymerase activity | Relative polymerase activity to wild-type | Normalized polymerase activity | Relative polymerase activity to wild-type |
| A/A                 | 4.97                                                   | 0.0418                         | 71.1%                                     | 0.00180                        | 45.6%                                     |
| A/E                 | 0.16                                                   | 0.0230                         | 39.2%                                     | 0.00201                        | 51.0%                                     |
| A/K                 | 18.89                                                  | 0.0814                         | 138.3%                                    | 0.00312                        | 78.9%                                     |
| A/S                 | 8.79                                                   | 0.0566                         | 96.3%                                     | 0.00459                        | 116.2%                                    |
| C/G                 | 9.45                                                   | 0.0354                         | 60.1%                                     | 0.00238                        | 60.3%                                     |
| C/T                 | 6.70                                                   | 0.0540                         | 91.8%                                     | 0.00256                        | 64.7%                                     |
| D/G                 | -3.06                                                  | 0.0369                         | 62.7%                                     | 0.00542                        | 137.0%                                    |
| D/I                 | 1.59                                                   | 0.0308                         | 52.3%                                     | 0.00276                        | 69.8%                                     |
| E/A                 | -2.14                                                  | 0.0324                         | 55.0%                                     | 0.00210                        | 53.2%                                     |
| E/R                 | 9.51                                                   | 0.0512                         | 87.1%                                     | 0.00345                        | 87.3%                                     |
| H/G                 | 4.49                                                   | 0.0196                         | 33.3%                                     | 0.00116                        | 29.2%                                     |
| H/P                 | 6.29                                                   | 0.0501                         | 85.2%                                     | 0.00261                        | 66.0%                                     |
| H/R                 | 14.13                                                  | 0.0547                         | 93.0%                                     | 0.00189                        | 47.7%                                     |
| M/P                 | 10.82                                                  | 0.0448                         | 76.2%                                     | 0.00158                        | 39.9%                                     |
| N/G                 | 9.03                                                   | 0.0632                         | 107.4%                                    | 0.00401                        | 101.5%                                    |
| N/V                 | 12.97                                                  | 0.0742                         | 126.1%                                    | 0.00289                        | 73.0%                                     |
| N/W                 | 12.20                                                  | 0.0670                         | 113.9%                                    | 0.00162                        | 40.9%                                     |
| Q/Q                 | 8.89                                                   | 0.0464                         | 78.9%                                     | 0.00319                        | 80.7%                                     |
| Q/V                 | 7.37                                                   | 0.0378                         | 64.3%                                     | 0.00260                        | 65.7%                                     |
| R/P                 | 15.99                                                  | 0.0774                         | 131.6%                                    | 0.00288                        | 72.8%                                     |
| S/A                 | 6.44                                                   | 0.0634                         | 107.8%                                    | 0.00254                        | 64.2%                                     |
| S/C                 | 5.76                                                   | 0.0307                         | 52.2%                                     | 0.00034                        | 8.6%                                      |
| S/E                 | -2.11                                                  | 0.0341                         | 58.0%                                     | 0.00166                        | 42.0%                                     |
| S/F                 | 1.91                                                   | 0.0190                         | 32.3%                                     | 0.00105                        | 26.6%                                     |
| S/L                 | 3.99                                                   | 0.0233                         | 39.5%                                     | 0.00217                        | 54.8%                                     |
| S/P                 | 8.88                                                   | 0.0671                         | 114.1%                                    | 0.00326                        | 82.5%                                     |
| S/R                 | 19.57                                                  | 0.0795                         | 135.1%                                    | 0.00483                        | 122.2%                                    |
| S/S                 | 9.14                                                   | 0.0543                         | 92.3%                                     | 0.00362                        | 91.6%                                     |
| T/P                 | 10.49                                                  | 0.0643                         | 109.3%                                    | 0.00324                        | 81.8%                                     |
| V/S                 | 7.69                                                   | 0.0240                         | 40.8%                                     | 0.00228                        | 57.6%                                     |
| D/K (WT)            | 11.08                                                  | 0.0588                         | 100.0%                                    | 0.00395                        | 100.0%                                    |
